# Supplementary material for: High expression of the stem cell marker GPR56 at diagnosis identifies acute myeloid leukemia patients at higher relapse risk after allogeneic stem cell transplantation with the CD34+/CD38- population
Source: PubMed Central journal article supplement — Haematologica. 2020 Jan 9;105(10):e507–11. doi: 10.3324/haematol.2019.229260 (PMC7556671; doi:10.3324/haematol.2019.229260), 2020-01-09
Supplement: 2019-229260-DisclosuresContributions.pdf [file 2019-229260-DisclosuresContributions.pdf]

Haematologica  
HAEMATOL/2019/229260  
Version 4

High expression of the stem cell marker GPR56 at diagnosis identifies acute myeloid leukemia patients at higher relapse risk after allogeneic stem cell transplantation in context with the CD34+/CD38- population

Madlen Jentsch, Marius Bill, Juliane Grimm, Julia Schulz, Luba Schuhmann, Dominic Brauer, Karoline Goldmann, Franziska Wilke, Georg-Nikolaus Franke, Gerhard Behre, Wolfram Pönisch, Vladan Vucinic, Dietger Niederwieser, Uwe Platzbecker, and Sebastian Schwind

Disclosures: The authors declare no conflict of interest.

Contributions: MJ and SS contributed to the design and analysis of this study and the writing of the manuscript, and all authors agreed on the final version. MJ, MB, JG, JS, LS, DB, FW and KG carried out the laboratory-based research; MJ and SS performed statistical analyses; and MJ, WP, GNF, VV, GB, UP, DN and SS were involved directly or indirectly in the care of patients and/or sample procurement.
